# Supplementary material
Source: publisher figshare collection journal article supplement (https://aacr.figshare.com/articles/dataset/_/23553189)
Supplement: Supplementary file 1 [file 41323698]

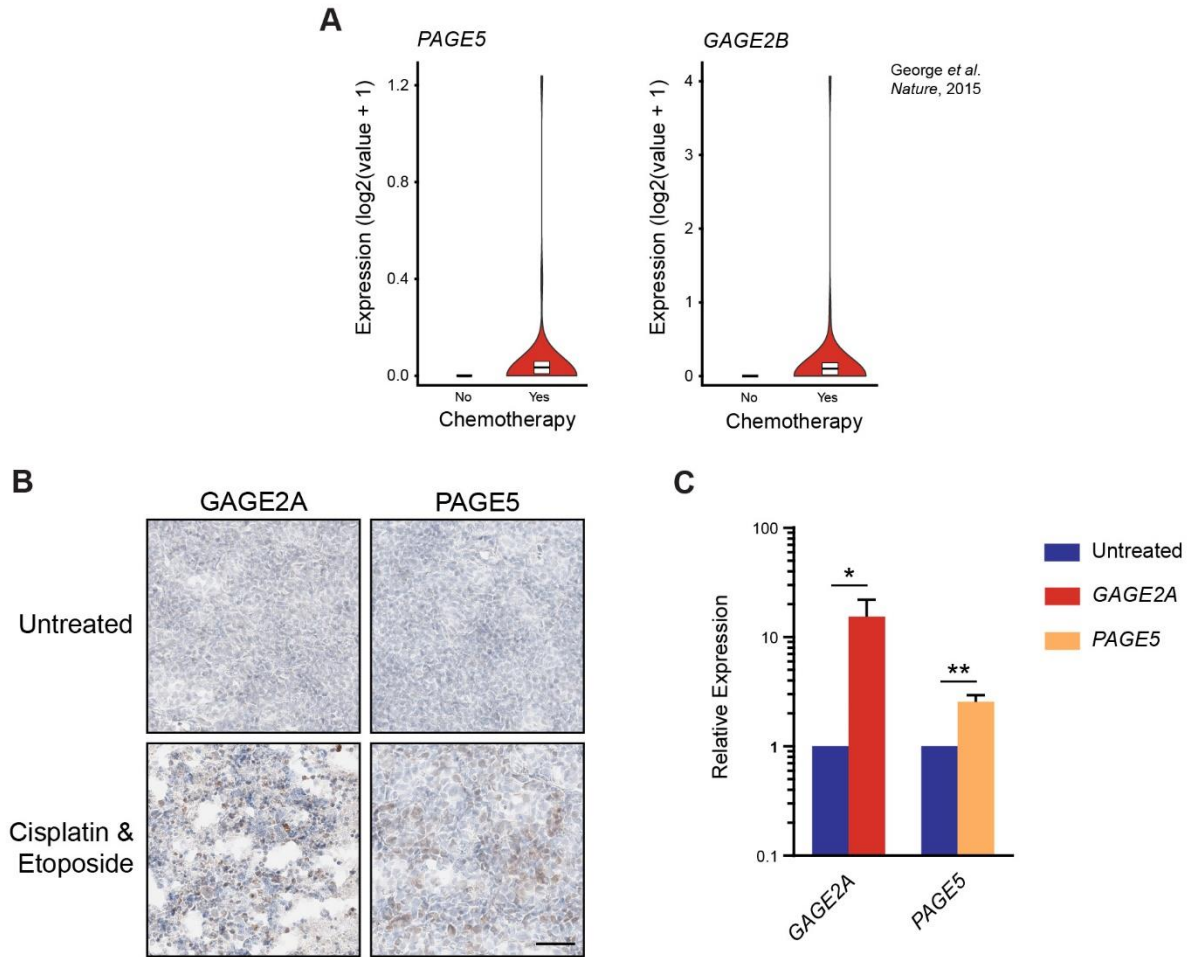

**Supplementary Figure S12 | GAGE2A and PAGE5 upregulation upon treatment of cisplatin and etoposide.** **A**, Expression of PAGE5 and GAGE2B in a dataset of 120 patient samples (9) plotted by whether the patients were treated with chemotherapy at the time of sample acquisition. **B**, Staining of human SCLC xenografts for GAGE2A and PAGE5 treated with or without cisplatin and etoposide. Scale bar = 50  $\mu$ m. **C**, Treatment of NCI-H1836, NCI-H209, NJH29, and NCI-H82 cells with cisplatin and etoposide for one week, then qRT-PCR performed for GAGE2A and PAGE5 expression. Significance assessed by an unpaired student's t-test where (\*)  $P < 0.05$  and (\*\*)  $P < 0.01$ .
